# Supplementary material for: Intranasal Delivery of Darunavir-Loaded Mucoadhesive In Situ Gel: Experimental Design, In Vitro Evaluation, and Pharmacokinetic Studies
Source: MDPI journal article supplement (doi:10.3390/gels8060342), 2022-05-30
Supplement: s1 [file s1]

**Table S1.** Phase transition temperature study of Poloxamer 407 solutions.

| Poloxamer 407<br>Concentration (% w/v) | Transition Temperature (°C) |              | Observation                                                                 |
|----------------------------------------|-----------------------------|--------------|-----------------------------------------------------------------------------|
|                                        | At Initial                  | At Gelling   |                                                                             |
|                                        | (Liquid) Stage              | Stage        |                                                                             |
| 15                                     | 4                           | -            | No phase transition took place till 40 °C.                                  |
| 16                                     | 4                           | -            | No phase transition took place till 40 °C.                                  |
| 17                                     | 4                           | -            | Viscosity increases at 38 °C but no phase transition took place till 40 °C. |
| 18                                     | 4                           | 37.04 ± 0.37 | Gelled at 37 °C–38 °C                                                       |
| 19                                     | 4                           | 35.44 ± 0.52 | Gelled at 35 °C–36 °C                                                       |
| 20                                     | 4                           | 33.18 ± 0.18 | Gelled at 33 °C–34 °C                                                       |
| 21                                     | 4                           | 30.42 ± 0.21 | Gelled at 30 °C–31 °C                                                       |
| 22                                     | 4                           | 26.75 ± 0.23 | Gelled at 26 °C–27 °C                                                       |
| 23                                     | 4                           | 22.57 ± 0.16 | Gelled at 22 °C–23 °C                                                       |
| 24                                     | 4                           | 19.80 ± 0.11 | Gelled at 19 °C–20 °C                                                       |
| 25                                     | 4                           | 15.42 ± 0.37 | Gelled at 15 °C–16 °C                                                       |

**Table S2.** Model fitting for selected in situ gel (D7).

| Model Name         | Multiple R | r2     | X Variable | Slope   | SSR      | Fischer Ratio |
|--------------------|------------|--------|------------|---------|----------|---------------|
| Zero order         | 0.9870     | 0.9741 | 11.4547    | 9.6988  | 209.4831 | 29.9262       |
| First order        | 0.9752     | 0.9510 | −0.1455    | 2.0926  | 887.1676 | 126.7382      |
| Higuchi            | 0.9880     | 0.9762 | 34.9555    | −7.8141 | 192.1643 | 27.4520       |
| Korsmeyer – Peppas | 0.9987     | 0.9974 | 0.7001     | −0.6480 | 20.4716  | 2.9245        |
| Weibull Model      | 0.9833     | 0.9669 | 1.1425     | −0.6676 | 128.0530 | 18.2933       |
| Hixson – Crowell   | 0.9947     | 0.9894 | 0.3453     | −0.0610 | 100.3033 | 14.3290       |

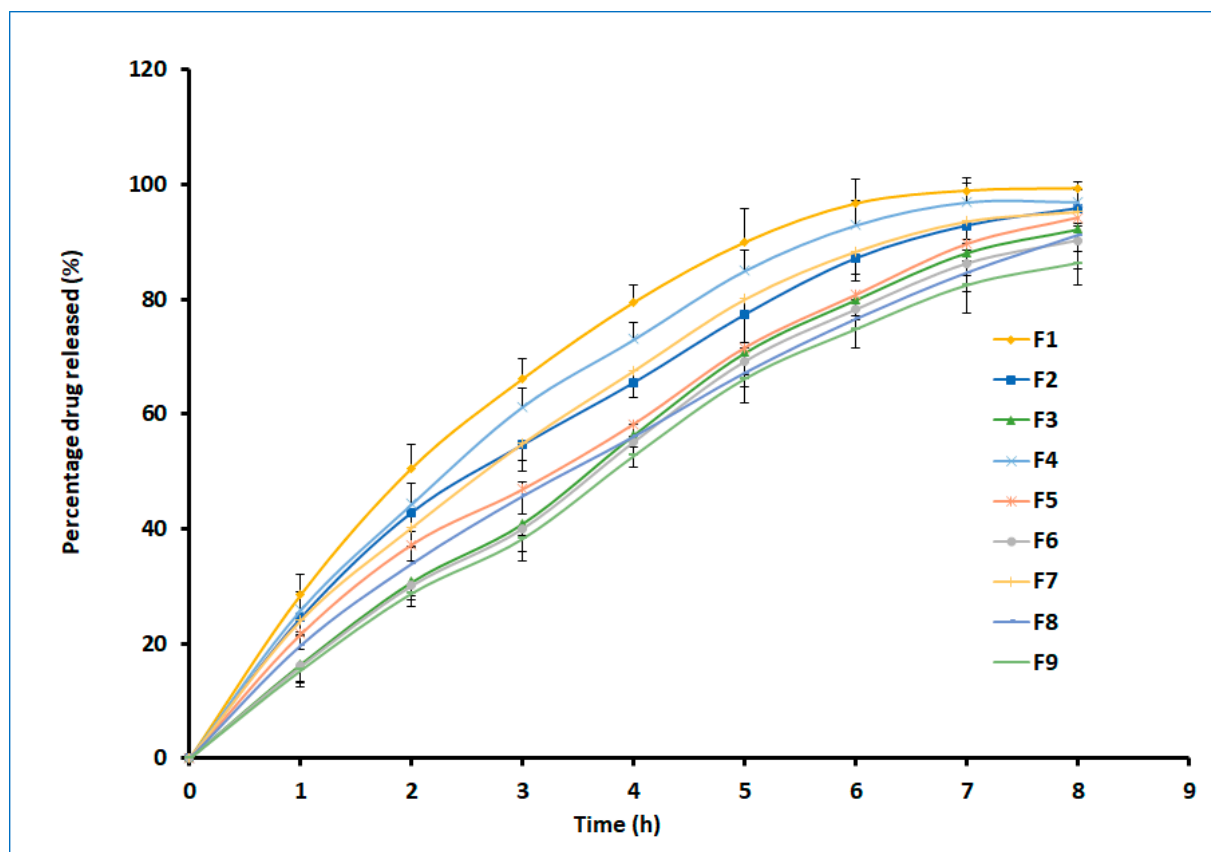

**Figure S1.** Comparison of percentage darunavir release from in situ gels (F1-F9). The data presented are the average  $\pm$  SD (n = 6).
